# Supplementary material for: Selectively “size-excluding” water molecules to enable a highly reversible zinc metal anode
Source: Royal Society of Chemistry journal article supplement (doi:10.1039/d3sc06934f), 2024-01-01
Supplement: d3sc06934f4.pdf [file d3sc06934f4.pdf]

## Supporting Information

### Selectively “Size-Excluding” Water Molecules to Enable Highly Reversible Zinc Metal Anode

Xiaowei Shen<sup>a,†</sup>, Wanhao Chen<sup>b,c,†</sup>, Haocong Wang<sup>e</sup>, Lifang Zhang<sup>b</sup>, Baojiu Hao<sup>b</sup>, Changhao Zhu<sup>b</sup>,  
Xiuzhen Yang<sup>b</sup>, Meizhu Sun<sup>b</sup>, Jinqiu Zhou<sup>b,\*</sup>, Xuejun Liu<sup>c,\*</sup>, Chenglin Yan<sup>d,e</sup>, Tao Qian<sup>b,\*</sup>

<sup>a</sup> School of Electrical Engineering, Nantong University, Nantong 226019, China

<sup>b</sup> School of Chemistry and Chemical Engineering, Nantong University, Nantong 226019, China

<sup>c</sup> College of Chemistry and Chemical Engineering, State Key Laboratory of Bio-fibers and Eco-textiles, Qingdao University, Qingdao 266071, China

<sup>d</sup> School of Petrochemical Engineering, Changzhou University, Changzhou 213164, China

<sup>e</sup> Key Laboratory of Core Technology of High Specific Energy Battery and Key Materials for Petroleum and Chemical Industry, College of Energy, Soochow University, Suzhou 215006, China

† The authors contributed equally to this work.

E-mails: jqiuzhou@ntu.edu.cn (J. Zhou); xjliu@qdu.edu.cn (X. Liu); qiantao@ntu.edu.cn (T. Qian).

## Experimental Section

**Materials.** Commercial Zn foil (0.1 mm) and Cu foil (0.1 mm) were purchased from Ailian of Tianjin, Ltd. Copper nitrate trihydrate ( $\text{Cu}(\text{NO}_3)_2 \cdot 3\text{H}_2\text{O}$ , >99.0%), decanoic acid ( $\text{C}_{10}\text{H}_{20}\text{O}_2$ , >99.5%), octanoic acid ( $\text{C}_8\text{H}_{16}\text{O}_2$ , >99.5%), hexadecanoic acid ( $\text{C}_{16}\text{H}_{32}\text{O}_2$ , >99.5%), sodium hydroxide (NaOH, >97.0%), ethanol ( $\text{C}_2\text{H}_5\text{OH}$ , >99.0%), vanadium pentoxide ( $\text{V}_2\text{O}_5$ , >99.5%), zinc sulfate heptahydrate ( $\text{ZnSO}_4 \cdot 7\text{H}_2\text{O}$ , >99.0%), and sodium sulfate ( $\text{Na}_2\text{SO}_4$ , >99.0%) of analytic grade were purchased from the Aladdin and used as received without further purification.

**Preparation of the metal soaps  $\text{CuC}_n$ .** For  $\text{CuC}_9$ , 2.41 g  $\text{Cu}(\text{NO}_3)_2 \cdot 3\text{H}_2\text{O}$  was dissolved in 10 mL deionized water. A mixture of 3.44 g decanoic acid and 0.8 g NaOH was also dissolved in 10 mL deionized water. Then the two solutions were mixed to get blue precipitate in a few seconds. In all cases, the precipitate was filtered and washed with water. The powder was obtained by drying in a spin evaporator to obtain the solid blue powder. Meanwhile, metal soap  $\text{CuC}_7$  and  $\text{CuC}_{15}$  were prepared using octanoic acid and hexadecanoic acid using the same method.

**Preparation of the  $\text{Zn@CuC}_n$  anode.** The  $\text{Zn@CuC}_9$  electrode was fabricated through an in electro spray self-assembly route. Firstly, we weighed 2g  $\text{CuC}_9$ , dissolved them in 20 mL of anhydrous ethanol and performed ultrasonication for 1 hour to prepare dispersion (The dispersity of  $\text{CuC}_9$  in ethanol is better than in  $\text{H}_2\text{O}$ ). The dispersion was put into an electric gun and sprayed onto the zinc foil with a certain sputtering time. The zinc foil was heated at 120 °C for 40 min, and then cooled down slowly to form the membranes. Meanwhile,  $\text{Zn@CuC}_7$  and  $\text{Zn@CuC}_{15}$  were prepared by the same process.

**Preparation of the NVO cathode material.** Firstly, 1.819 g  $\text{V}_2\text{O}_5$  and 0.400 g NaOH were dissolved in 40 mL deionized water under magnetically stirring for 30 min. After that, the solution was transferred to 50 mL autoclave and kept at 180 °C for 48 h. Then, the product in autoclave were collected by centrifugation and washed with deionized water and ethanol for 3 times, respectively, and dried at 80 °C in vacuum for 12 h. After heating at 300 °C in the air for 2 hours, the NVO powder was obtained.

**Characterizations.** The crystallographic phase of the as-prepared products was studied by X-ray power diffraction (XRD, Rigaku D/max2500). For analyzing pore structure,  $\text{H}_2\text{O}$  (298 K) and  $\text{N}_2$  (77 K) sorption experiments were performed with ASAP 2460 (Micromeritics Corp., USA). The morphologies of the samples were characterized by scanning electron microscopy (Gemini SEM 300

(Japan)). Four-probe resistance results were obtained from tester H7756 and contact angle results were obtained from DSA 25 (KRUSS). The generation of H<sub>2</sub> was analyzed by gas chromatography (GC-2014, Shimadzu). Atomic force microscopy (AFM) and Kelvin probe force microscopy (KPFM) images were obtained using an Omega Scope 1000 system from AIST-NT. X-ray photoelectron spectroscopy (XPS) measurements were obtained on a spectrometer (Escalab 250xi, Thermo Scientific).

**Electrochemical Measurements.** Linear scanning voltammetry (LSV), Tafel plot, CV and Electrochemical Impedance Spectroscopy (EIS) tests are performed on a CHI760E electrochemical workstation. The LSV was tested using a Zn@CuC<sub>9</sub> batteries with a scan rate of 1 mV s<sup>-1</sup>. The Tafel plot test used a three-electrode system (Working electrode: Zn, Counter electrode: Pt, Reference electrode: Ag/AgCl, Salt bridge: Saturated KCl solution) with a scan rate of 1 mV s<sup>-1</sup>. The electrochemical performances of Zn//Zn or Zn//Cu half batteries, and Zn//NVO full batteries were tested in the form of encapsulated coin batteries (CR2032). Glass fiber separators (GF/A) were used in all coin cells. Testing of batteries for galvanostatic charge/discharge cycles is performed on the Neware battery testing system. The Zn//Zn symmetric batteries were cycled with different current densities and capacities. The Zn//Cu batteries were cycled with a fixed discharge capacity and charge cut-off voltage of 1 V. For full Zn//NVO batteries, NVO cathode loading is 1-2 mg cm<sup>-2</sup>. The scan rate for CV testing of Zn//NVO full batteries is 1 mV s<sup>-1</sup>. Zn//NVO full batteries were cycled in the voltage range of 0.4-1.4 V.

**DFT calculations.** One unit CuC<sub>n</sub> was used to stand for the system of CuC<sub>n</sub> to simulate the behavior of Zn<sup>2+</sup> and H<sub>2</sub>O in different carbon chain. All DFT calculations were performed on Vienna ab initio simulation package (VASP). The generalized gradient approximation (GGA) within the framework of Perdew-Burke-Ernzerhof (PBE) functional was used for the description of exchange-correlation potential. The van der Waals (vdW) interaction was considered using the zero damping DFT-D3 method of Grimme. An energy cutoff of 450 eV and  $\Gamma$  k-point sampling sets of  $1 \times 1 \times 1$  was used to be converged. The criterion for all structural optimizations was set to 10<sup>-5</sup> eV for electronic energy convergence and Hellmann-Feynman force less than 0.02 eV/Å for ionic relaxation loop. The implicit solvent model, VASPsol, was applied to considered effects between the solute and solvent in all DFT simulations energies.

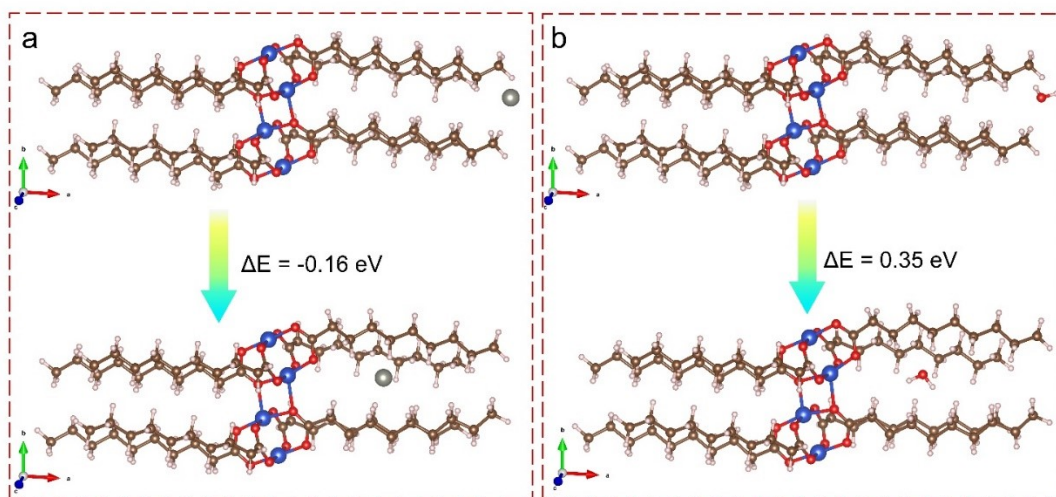

**Figure S1.** The calculated energy difference of (a) zinc ions and (b) water molecule into the channel between decyl group chains of CuC<sub>9</sub>.

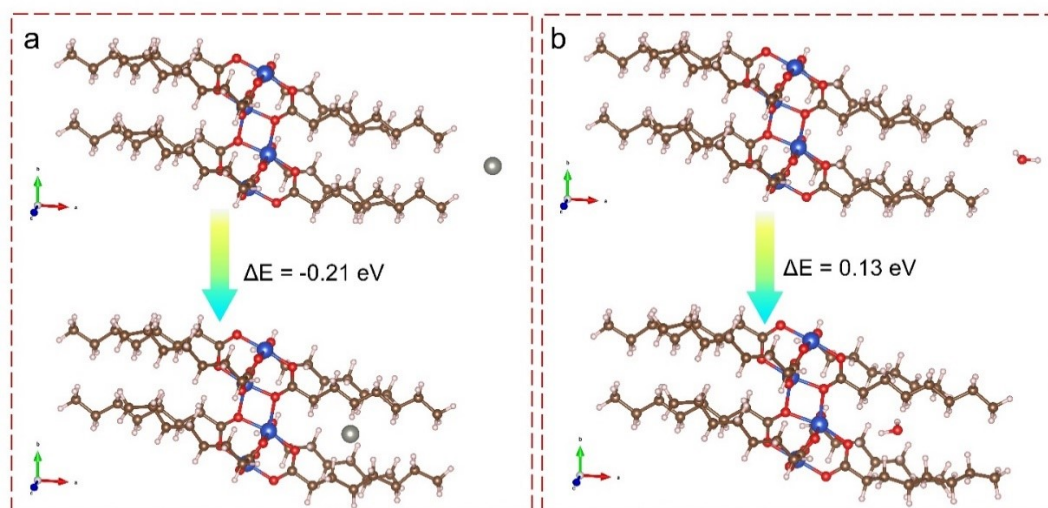

**Figure S2.** The calculated energy difference of (a) zinc ions and (b) water molecule into the channel between octyl group chains of  $\text{CuC}_7$ .

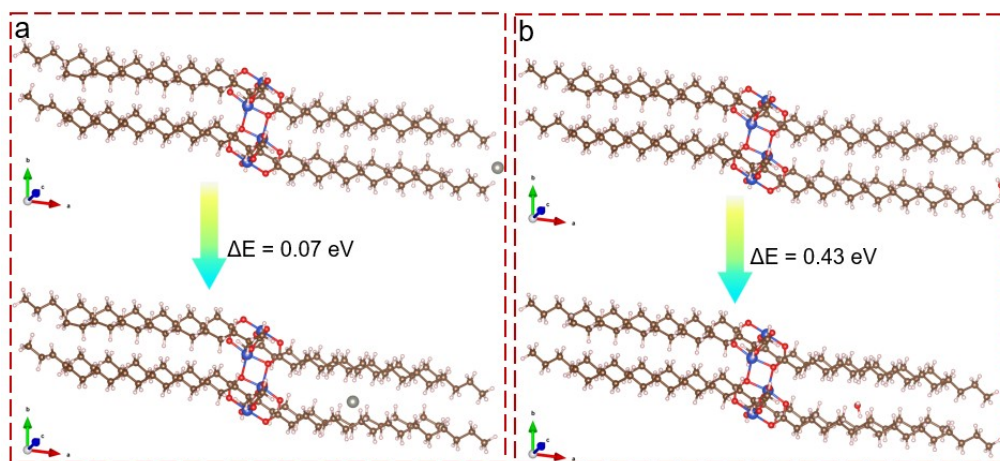

**Figure S3.** The calculated energy difference of (a) zinc ions and (b) water molecule into the channel between cetyl group chains of CuC<sub>15</sub>.

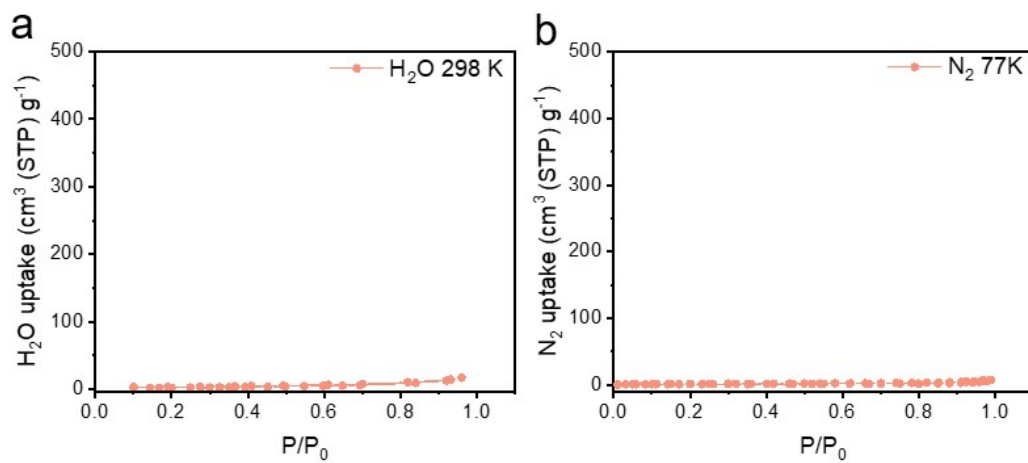

**Figure S4.** (a) H<sub>2</sub>O adsorption isotherms of CuC<sub>9</sub> at 298 K; (b) N<sub>2</sub> adsorption isotherms of CuC<sub>9</sub> at 77 K.

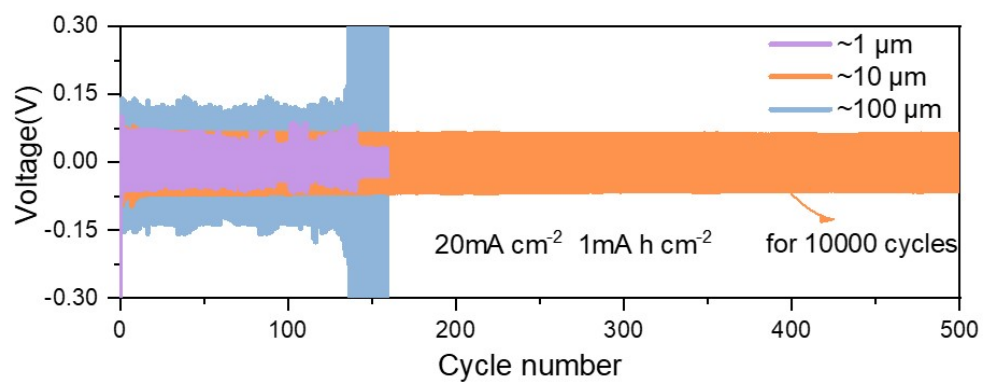

**Figure S5.** Symmetric cells of Zn@CuC<sub>9</sub> with different thickness of Cu soap films at 20 mA cm<sup>-2</sup>-1 mAh cm<sup>-2</sup>.



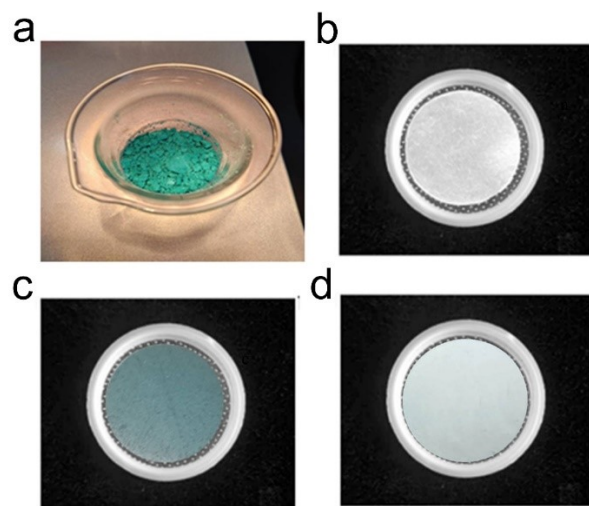

**Figure S6.** (a) A digital photo of the metal soap ( $\text{CuC}_9$ ). The optical pictures of (b) the bare Zn,  $\text{Zn@CuC}_9$  anode (c) before and (d) after heating.

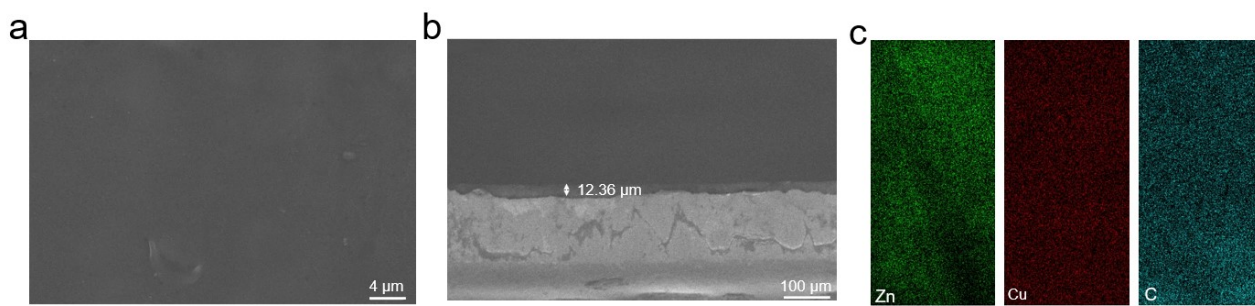

**Figure S7.** (a) top-view, (b) cross-sectional SEM images, and (c) corresponding EDS mapping of as-synthesized Zn@CuC<sub>9</sub> before cycling.

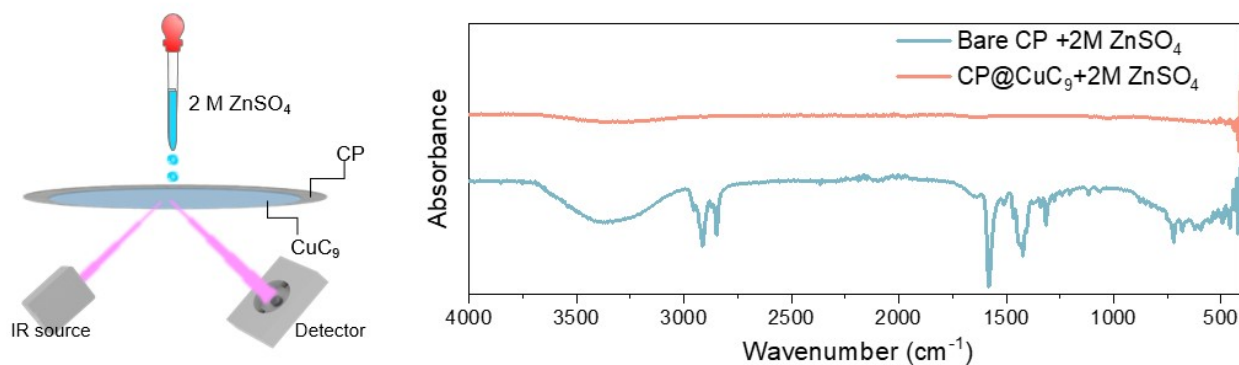

**Figure S8.** FTIR spectra of “Bare CP+2 M ZnSO<sub>4</sub>” and “CP@CuC<sub>9</sub>+2 M ZnSO<sub>4</sub>”.

Hydrophilic carbon paper (CP) is used as substrate of zinc salt (2 M ZnSO<sub>4</sub>) solution to determine the free-water molecules. A metal soap film is attached to one side of CP to prepare CP@CuC<sub>9</sub>. As shown in Figure S8, the FTIR spectra of “Bare CP+2 M ZnSO<sub>4</sub>” and “CP@CuC<sub>9</sub>+2 M ZnSO<sub>4</sub>” are tested to determine the penetration of free water into CuC<sub>9</sub> film. As a reference, free-water molecules give rise to a broad band of O-H stretching vibration located at  $\approx 3370\text{ cm}^{-1}$  owing to the H-bonding environments of water clusters.<sup>S1</sup> It is found that almost no identifiable peaks associated with free water molecules are detected in the vicinity of  $3370\text{ cm}^{-1}$  (O-H stretching), which is a strong evidence that the CuC<sub>9</sub> film contains virtually no free water molecules.

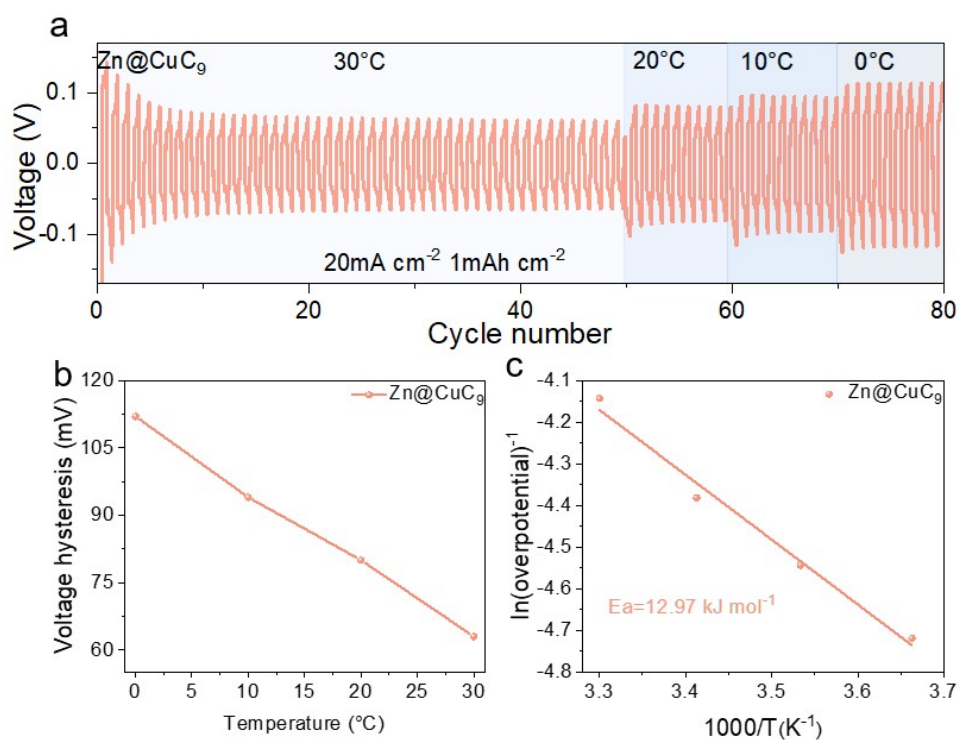

**Figure S9.** (a) Symmetrical cells of Zn@CuC<sub>9</sub> at different temperatures. (b) summarized overpotentials of the cells under various temperatures; (c) corresponding activation energies of the reaction.

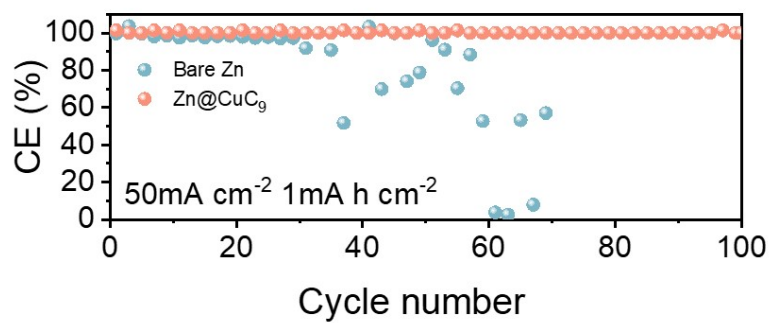

**Figure S10.** CE of the asymmetric Zn//Cu half-cells with and without CuC<sub>9</sub> interface at  $50\text{ mA cm}^{-2}$ ,  $1\text{ mA h cm}^{-2}$ .

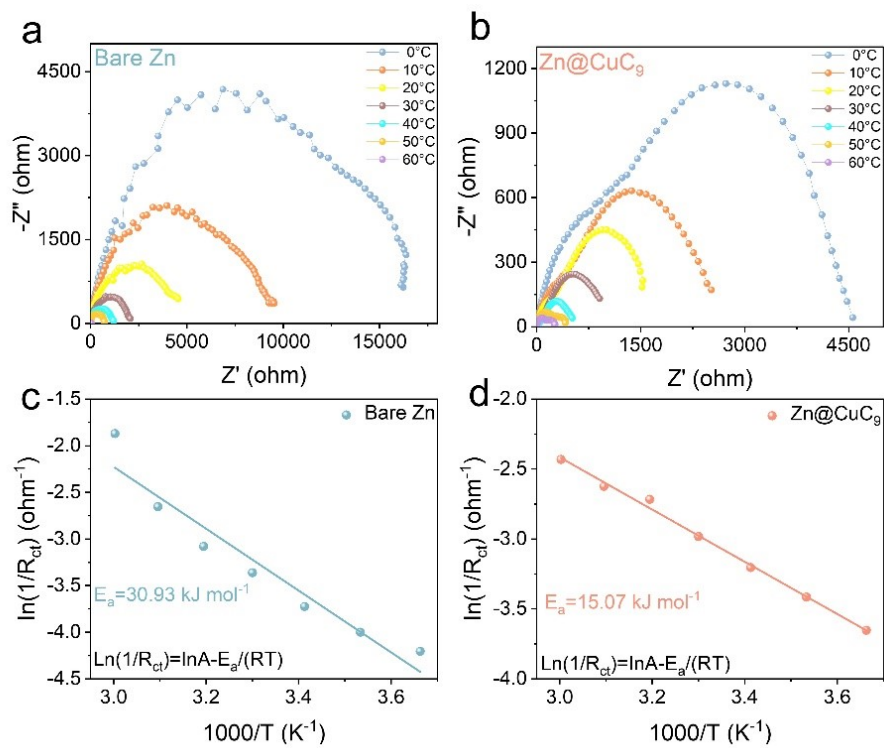

**Figure S11.** (a-b) EIS results at different temperatures. (c-d) Arrhenius curve comparison.

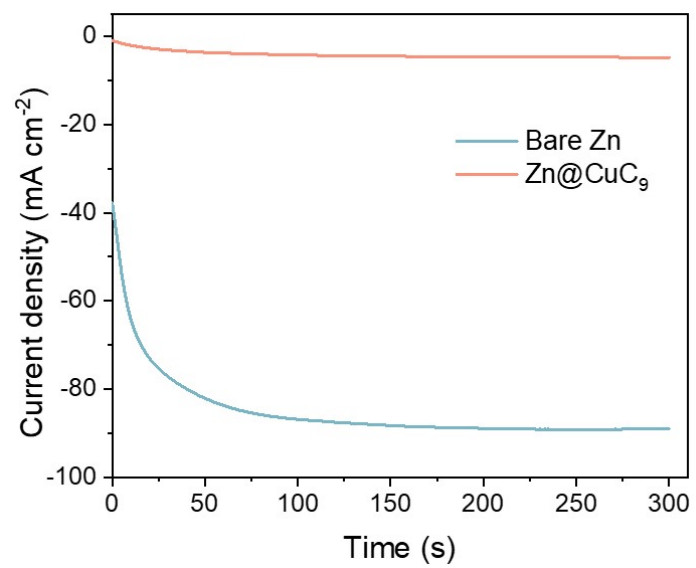

**Figure S12.** CA profiles of Zn//Zn symmetric cells with and without Cu soap film under a voltage of -150 mV.

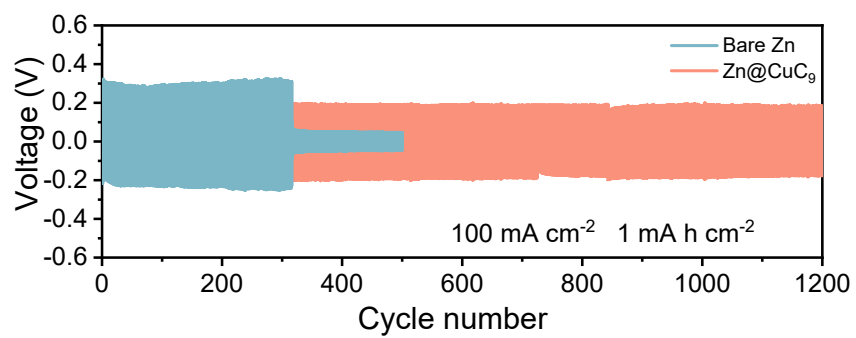

**Figure S13.** Cycling reversibility test of symmetric cells with bare Zn or Zn@CuC<sub>9</sub> electrode under current densities 100 mA cm<sup>-2</sup> with 1 mA h cm<sup>-2</sup>.



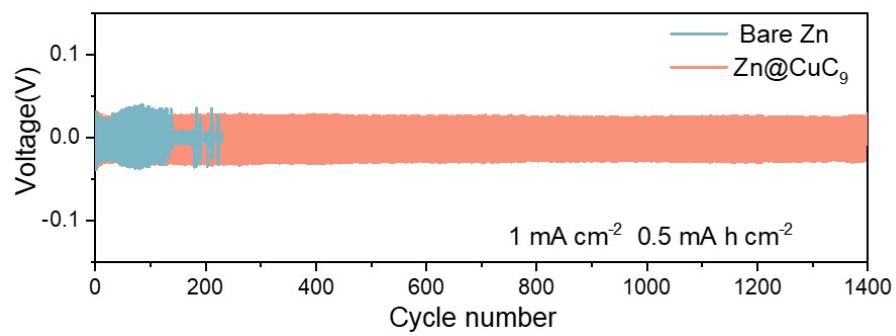

**Figure S14.** Symmetric half-cells of bare Zn and Zn@CuC<sub>9</sub> at 1 mA cm<sup>-2</sup>-0.5 mA h cm<sup>-2</sup>.

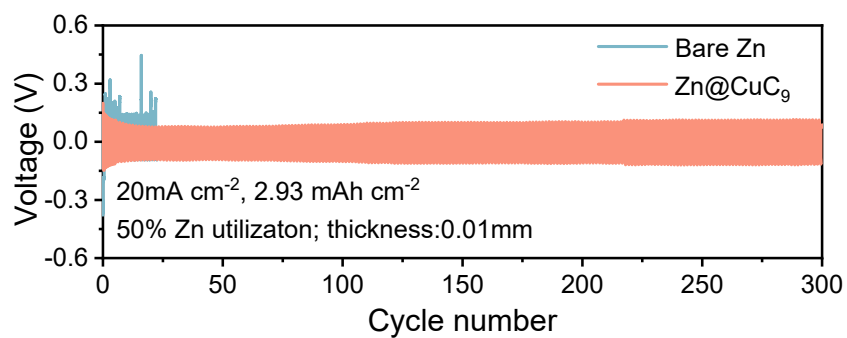

**Figure S15.** Performance of Symmetric Zn//Zn half-cells with 50% utilization rate by using ultrathin Zn foil (thickness of 0.01mm).

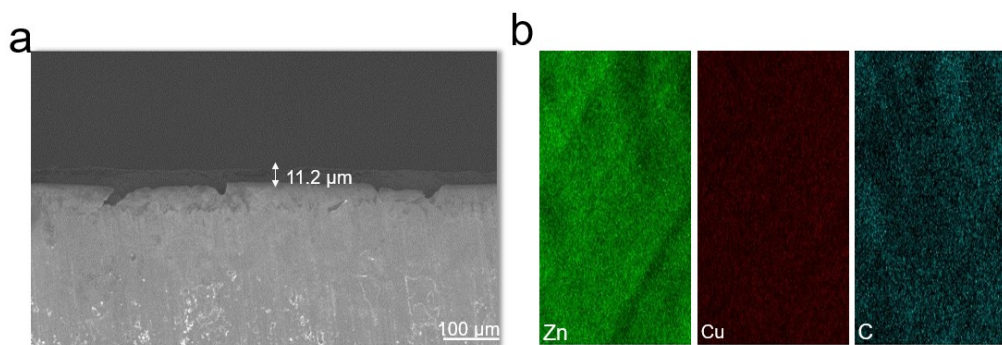

**Figure S16.** (a) cross-sectional SEM images, and (b) corresponding EDS mapping of Zn@CuC<sub>9</sub> after cycling.

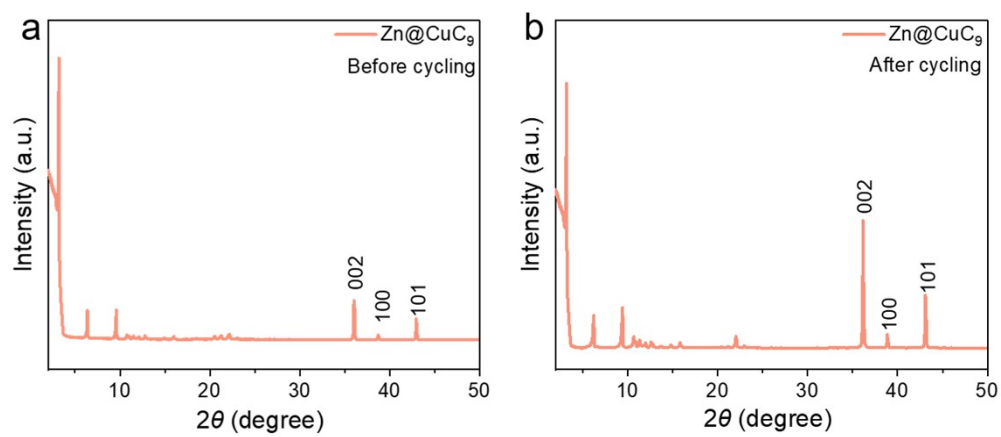

**Figure S17.** XRD spectra of the Zn@CuC<sub>9</sub> anodes before and after cycling.

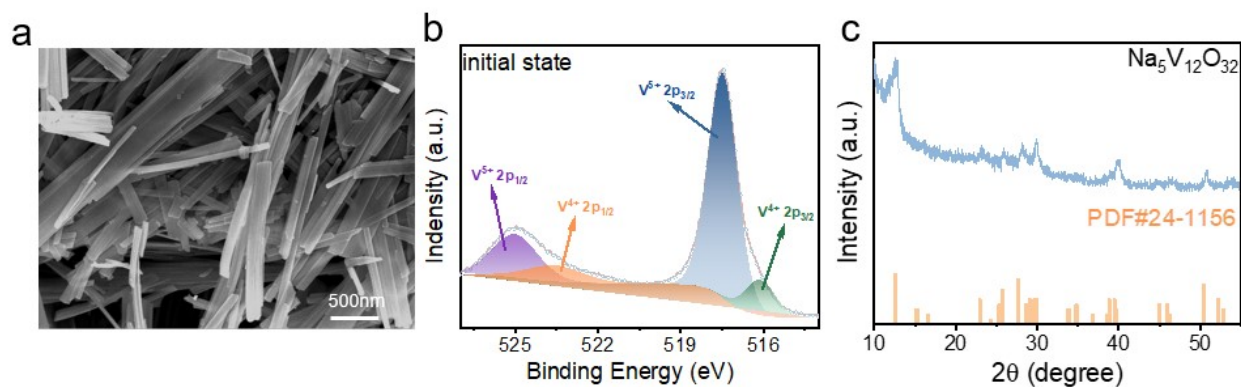

**Figure S18.** Characterization of the synthesized NVO: (a) SEM, (b)XPS, (c) XRD.

The morphology and phase of the synthesized NVO powder have been characterized by SEM, XPS and XRD. NVO displays nanobelt morphology (Figure S18a), typically with a length of several micrometers and a width of about 200 nm. As shown in Figure S18b, the V  $2p_{3/2}$  peak at initial state can be divided into two different peaks located at 516.7 and 517.4 eV, which correspond to  $V^{4+} 2p_{3/2}$  and  $V^{5+} 2p_{3/2}$ , respectively. All the diffraction peaks of NVO match well with the monoclinic NVO phase (Figure S18c).<sup>66</sup>

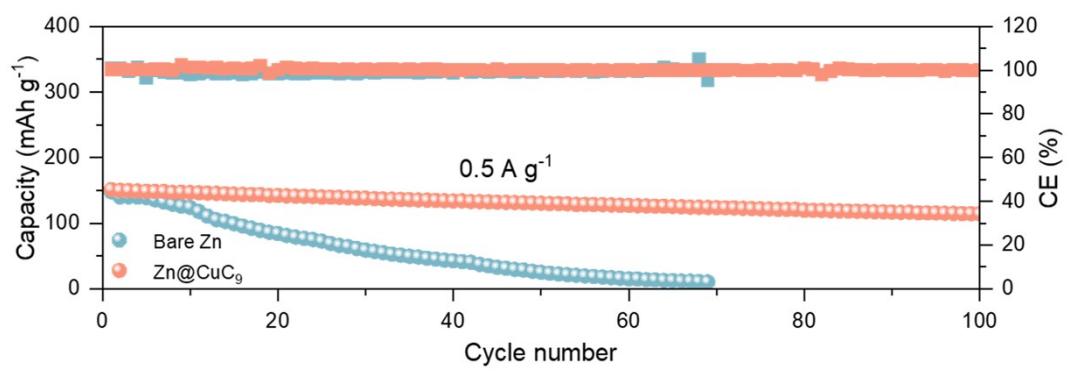

**Figure S19.** Cycling stability of bare Zn//NVO and Zn@CuC<sub>9</sub>//NVO full cells at a low rate of 0.5 A g<sup>-1</sup>.

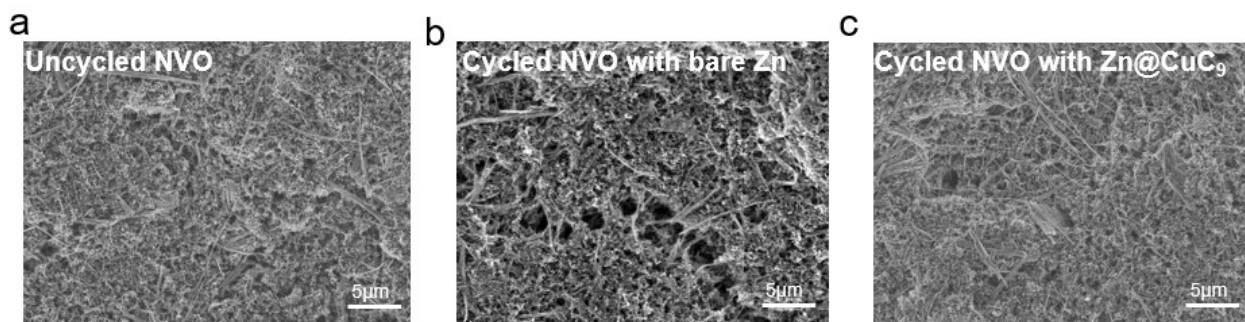

**Figure S20.** The SEM of (a) uncycled NVO, (b) cycled NVO with bare Zn, and (c) cycled NVO with Zn@CuC<sub>9</sub>.

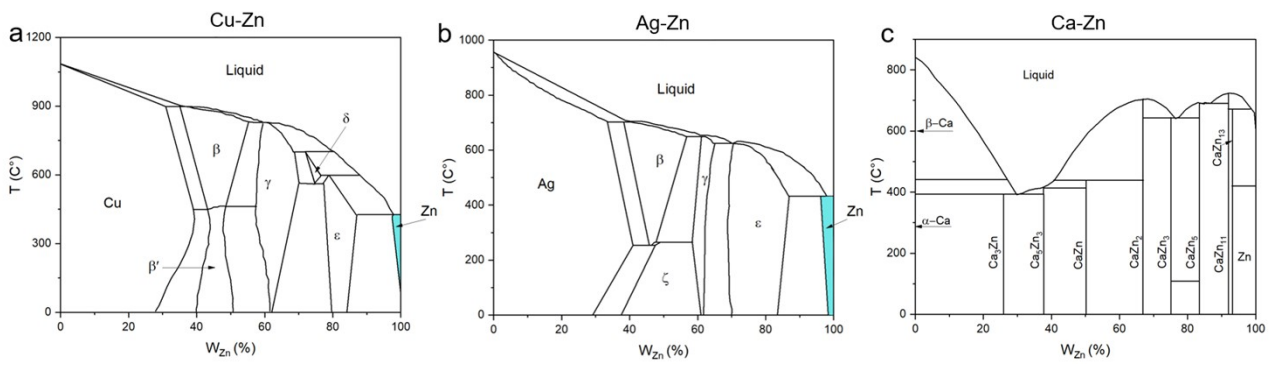

**Figure S21.** The binary phase diagram of the (a) Cu-Zn system, (b) Ag-Zn system and (c) Ca-Zn system.



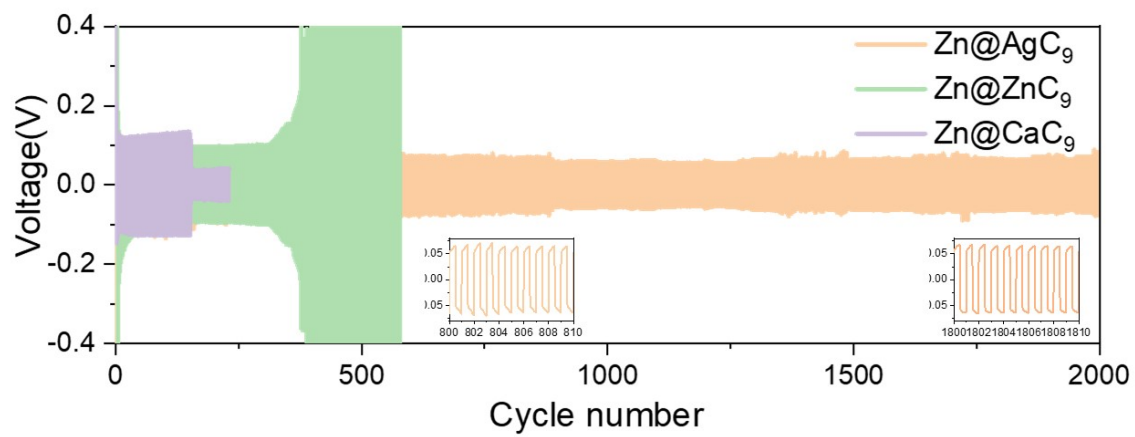

**Figure S22.** Symmetric cells of Zn@CaC<sub>9</sub>, Zn@ZnC<sub>9</sub> and Zn@AgC<sub>9</sub> at 20 mA cm<sup>-2</sup>-1 mA h cm<sup>-2</sup>.

**Table S1.** Crystal data of different metal soaps.

| <b>Crystal data</b> | <b>CuC<sub>7</sub></b> | <b>CuC<sub>9</sub></b> | <b>CuC<sub>15</sub></b> |
|---------------------|------------------------|------------------------|-------------------------|
| space group         | P-1 (2)                | <i>C2/c</i> (15)       | <i>C2/c</i> (15)        |
| a (Å)               | 5.14137                | 55.68300               | 85.15700                |
| b (Å)               | 8.51928                | 5.10660                | 5.05300                 |
| c (Å)               | 22.12405               | 16.50200               | 16.10600                |
| $\alpha$ (°)        | 83.773                 | 90                     | 90                      |
| $\beta$ (°)         | 84.562                 | 93.93                  | 91.288                  |
| $\gamma$ (°)        | 76.144                 | 90                     | 90                      |

**Table S2.** H<sub>2</sub> production rate of different sampling times.

| Sample              | H <sub>2</sub> production rate (μg h <sup>-1</sup> ) |                      |                      |                      |                      |
|---------------------|------------------------------------------------------|----------------------|----------------------|----------------------|----------------------|
|                     | 6 <sup>th</sup> min                                  | 12 <sup>th</sup> min | 18 <sup>th</sup> min | 24 <sup>th</sup> min | 30 <sup>th</sup> min |
| Bare Zn             | 1.41                                                 | 1.52                 | 1.65                 | 1.70                 | 1.78                 |
| Zn@CuC <sub>9</sub> | 0.02                                                 | 0.12                 | 0.12                 | 0.13                 | 0.13                 |

## References

S1 T. Liu, X. Du, H. Wu, Y. Ren, J. Wang, H. Wang, Z. Chen, J. Zhao, and G. Cui, *Angew. Chem. Int. Ed.*, 2023, **62**, e202311589.
